# Supplementary material
Source: Research Square preprint supplement (doi:10.21203/rs.3.rs-8424355/v1)
Supplement: Supplementary file 1 [file 23367d9785d5edce6ffb96cc.docx]

Supplementary Table 1. Parameters and parameter values of each model.

| Model Name | Parameter | Parameter Value |
| --- | --- | --- |
| LR | multi_class | ovr |
|  | max_iter | 2000 |
|  | C | 0.1 |
|  | solver | liblinear |
|  | penalty | l2 |
|  | random_state | random_state |
| RF | n_estimators | 200 |
|  | max_depth | 10 |
|  | min_samples_split | 5 |
|  | min_samples_leaf | 2 |
|  | bootstrap | True |
|  | random_state | random_state |
| GB | n_estimators | 200 |
|  | learning_rate | 0.05 |
|  | max_depth | 8 |
|  | min_samples_split | 4 |
|  | min_samples_leaf | 1 |
|  | subsample | 0.8 |
|  | random_state | random_state |
| SVM | kernel | rbf |
|  | C | 1.0 |
|  | gamma | scale |
|  | probability | True |
|  | class_weight | balanced |
|  | cache_size | 200 |
|  | random_state | random_state |
| KNN | n_neighbors | 7 |
|  | weights | distance |
|  | algorithm | auto |
|  | p | 2 |
| NB | var_smoothing | 1e-9 |
| XGB | use_label_encoder | False |
|  | eval_metric | mlogloss |
|  | n_estimators | 200 |
|  | max_depth | 6 |
|  | learning_rate | 0.05 |
|  | subsample | 0.8 |
|  | colsample_bytree | 0.8 |
|  | reg_alpha | 0.1 |
|  | reg_lambda | 0.1 |
|  | random_state | random_state |
| DT | max_depth | 8 |
|  | min_samples_split | 5 |
|  | min_samples_leaf | 2 |
|  | random_state | random_state |

DT = Decision Tree; GB = Gradient Boosting; KNN = k-Nearest Neighbors; LR = Logistic Regression; NB = Naive Bayes; RF = Random Forest; SVM = Support Vector Machine; XGB = Extreme Gradient Boosting.

Supplementary Table 2. Comparison of intra-group characteristics in the Training and External Validation Cohorts

| Variable | Training Cohort (n = 323) | | | | | Validation Cohort (n = 129) | | | | |
| --- | --- | --- | --- | --- | --- | --- | --- | --- | --- | --- |
| mPAP≤20 mmHg  (n = 43) | 20＜mPAP≤35 mmHg  (n = 79) | 35＜mPAP≤45 mmHg  (n = 92) | mPAP＞45 mmHg  (n = 160) | *p*-value | mPAP≤20 mmHg  (n = 14) | 20＜mPAP≤35 mmHg  (n = 20) | 35＜mPAP≤45 mmHg  (n = 27) | mPAP＞45 mmHg  (n = 60) | *p*-value |
| **Demographics** |  |  |  |  |  |  |  |  |  |  |
| Age, years | 61.00 (47.50, 70.00) | 58.00 (46.00, 68.00) | 54.50 (40.75, 64.00) | 55.00 (40.75, 64.25) | 0.039 | 59.00 (51.00, 66.00) | 58.00 (55.50, 64.00) | 54.50 (34.75, 60.75) | 53.00 (46.50, 60.50) | 0.067 |
| Sex |  |  |  |  | <0.001 |  |  |  |  | 0.002 |
| 1, % | 43 | 40 | 33 | 55 |  | 14 | 9 | 15 | 26 |  |
| 2, % | 0 | 39 | 59 | 105 |  | 0 | 11 | 12 | 34 |  |
| BMI, kg/m2 | 24.84 ± 3.76 | 24.75 ± 3.56 | 24.21 ± 3.99 | 23.25 ± 3.63 | 0.004 | 25.57 ± 2.86 | 23.12 ± 2.85 | 25.76 ± 3.98 | 23.59 ± 2.95 | 0.020 |
| BSA, m2 | 1.73 ± 0.18 | 1.73 ± 0.19 | 1.73 ± 0.21 | 1.70 ± 0.17 | 0.503 | 1.80 ± 0.18 | 1.69 ± 0.18 | 1.89 ± 0.24 | 1.73 ± 0.19 | 0.012 |
| **Clinical parameters** |  |  |  |  |  |  |  |  |  |  |
| NT_proBNP, pg/ml | 66.40 (42.45, 102.25) | 89.90 (51.56, 211.55) | 330.15 (89.30, 745.50) | 895.00 (317.78, 2146.50) | <0.001 | 61.10 (39.57, 90.35) | 87.75 (63.88, 362.88) | 453.00 (124.75, 1126.50) | 717.05 (256.25, 1763.50) | <0.001 |
| 6MWD, m | 486.00 (422.50, 538.00) | 450.00（380.00 - 491.00） | 409.50 (312.25,453.75) | 330.00 (227.25, 421.25) | <0.001 | 489.00 (435.00,513.00) | 440.00 (385.0，477.25) | 389.50 (373.0，474.0) | 245.00 (185.00, 363.75) | <0.001 |
| HR, bpm | 73.26 ± 12.08 | 76.80 ± 12.70 | 78.27 ± 13.33 | 83.23 ± 12.24 | <0.001 | 71.93 ± 12.29 | 83.45 ± 10.84 | 75.56 ± 10.60 | 80.93 ± 10.43 | 0.004 |
| sBP, mmHg | 124.00 ± 16.58 | 119.90 ± 16.60 | 119.20 ± 16.80 | 119.24 ± 17.87 | 0.419 | 121.07 ± 21.91 | 132.55 ± 11.32 | 124.3 ± 23.64 | 119.30 ± 15.04 | 0.020 |
| dBP, mmHg | 78.47 ± 11.76 | 72.71 ± 11.22 | 73.64 ± 10.96 | 74.04 ± 11.20 | 0.087 | 74.93 ± 9.23 | 78.53±7.61 | 75.19 ± 11.05 | 76.53 ± 11.48 | 0.656 |
| SpO2 | 97.00 (95.00, 98.00) | 95.00 (93.50, 97.00) | 94.00 (90.00, 96.00) | 91.00 (88.00, 95.00) | <0.001 | 95.00 (92.00, 96.00) | 94.00 (91.50, 95.00) | 93.00 (90.50, 94.00) | 92.00 (88.00, 95.00) | 0.013 |
| Cardiac_Function |  |  |  |  | <0.001 |  |  |  |  | <0.001 |
| 1 | 18 | 25 | 5 | 6 |  | 9 | 2 | 4 | 2 |  |
| 2 | 24 | 44 | 53 | 87 |  | 5 | 12 | 20 | 41 |  |
| 3 | 1 | 9 | 29 | 44 |  | 0 | 6 | 3 | 15 |  |
| 4 | 0 | 1 | 5 | 23 |  | 0 | 0 | 0 | 2 |  |

Table 1 (continued)

| Variable | Training Cohort (n = 323) | | | | | Validation Cohort (n = 129) | | | | |
| --- | --- | --- | --- | --- | --- | --- | --- | --- | --- | --- |
| mPAP≤20 mmHg  (n = 43) | 20＜mPAP≤35 mmHg  (n = 79) | 35＜mPAP≤45 mmHg  (n = 92) | mPAP＞45 mmHg  (n = 160) | *p*-value | mPAP≤20 mmHg  (n = 14) | 20＜mPAP≤35 mmHg  (n = 20) | 35＜mPAP≤45 mmHg  (n = 27) | mPAP＞45 mmHg  (n = 60) | *p*-value |
| Subgroup |  |  |  |  | <0.027 |  |  |  |  | 0.092 |
| 1 | 15 | 20 | 29 | 66 |  | 1 | 6 | 5 | 19 |  |
| 2 | 0 | 1 | 0 | 3 |  | 0 | 0 | 0 | 0 |  |
| 3 | 0 | 0 | 1 | 2 |  | 0 | 0 | 0 | 0 |  |
| 4 | 28 | 55 | 60 | 89 |  | 13 | 12 | 21 | 40 |  |
| 5 | 0 | 3 | 2 | 2 |  | 0 | 2 | 1 | 1 |  |
| **Echocardiography** |  |  |  |  |  |  |  |  |  |  |
| LVEF, % | 69.00 (65.50, 71.00) | 64.00 (58.90, 69.00) | 60.67 (52.51, 66.50) | 54.99 (41.70, 66.00) | <0.001 | 69.00 (65.25, 71.00) | 67.15 (64.00, 69.25) | 59.60 (41.78, 66.41) | 48.40 (37.54, 61.90) | <0.001 |
| PASP, mmHg | 31.72 ± 10.05 | 52.27 ± 18.53 | 71.40 ± 16.34 | 92.18 ± 20.24 | <0.001 | 30.50 ± 12.13 | 56.55 ± 19.47 | 72.96 ± 17.00 | 93.71 ± 21.67 | <0.001 |
| EI | 0.99 (0.96, 1.02) | 1.04 (1.00, 1.15) | 1.24 (1.13, 1.40) | 1.40 (1.30, 1.53) | <0.001 | 0.9979 ± 0.0302 | 1.07 (1.06, 1.15) | 1.29 (1.17, 1.44) | 1.39 (1.28, 1.49) | <0.001 |
| LVD, mm | 48.00 (44.50, 51.50) | 44.00 (39.00, 47.00) | 36.90 (33.00, 40.00) | 34.00 (31.00, 37.45) | <0.001 | 48.00 (46.25, 50.50) | 39.75 (36.75, 44.25) | 36.00 (34.25, 39.15) | 33.00 (31.00, 37.00) | <0.001 |
| RVD, mm | 33.23 ± 3.95 | 36.20 ± 4.96 | 42.78 ± 6.04 | 48.14 ± 6.53 | <0.001 | 34.57 ± 4.15 | 39.48 ± 6.15 | 45.44 ± 6.95 | 48.08 ± 7.64 | <0.001 |
| MPA, mm | 25.00 (24.00, 28.50) | 28.70(26.00, 32.38) | 31.90 (28.95, 34.58) | 33.00 (30.90, 35.90) | <0.001 | 25.00 (23.00, 28.00) | 29.75 (28.28, 31.00) | 31.70 (29.00, 35.50) | 33.00 (29.23, 37.13) | <0.001 |
| RPA, mm | 18.00 (17.0, 20.0) | 20.70 (19.00, 23.00) | 23.00 (21.00, 25.77) | 23.50 (21.90, 25.12) | <0.001 | 17.00 (16.00, 17.75) | 22.00 (20.60, 23.68) | 23.00 (20.90, 25.15) | 24.00 (21.98, 25.70) | <0.001 |
| LPA, mm | 17.00 (17.00, 19.00) | 19.0 (17.2, 21.0) | 21.00 (20.00, 22.75) | 21.90 (20.00, 23.52) | <0.001 | 17.00 (16.00, 18.00) | 19.85 (18.60, 21.00) | 21.50 (19.70, 22.85) | 22.25 (21.00, 24.52) | <0.001 |
| RVEDA, cm2 | 18.30 (16.25, 23.35) | 17.20 (13.70, 21.60) | 21.6 (17.85，24.20) | 27.1 (22.5，32.5) | <0.001 | 18.80 (16.00, 20.62) | 17.15 (14.25, 21.50) | 26.10 (21.50, 29.30) | 27.80 (21.95, 33.67) | <0.001 |
| RVESA, cm2 | 10.90 (7.95, 13.80) | 10.00 (7.10, 13.25) | 14.05 (11.10, 19.30) | 20.0 (15.3, 25.2) | <0.001 | 10.15 (8.35, 12.33) | 9.40 (7.67, 12.42) | 15.70 (12.45, 20.40) | 19.10 (14.60, 25.85) | <0.001 |
| FAC, % | 43.92 ± 7.73 | 43.54 ± 8.88 | 34.70 ± 10.17 | 27.36 ± 8.75 | <0.001 | 45.66 ± 7.68 | 42.02 ± 8.63 | 36.10 ± 10.82 | 29.23 ± 9.06 | <0.001 |
| TAPSE, mm | 20.60 ± 3.23 | 19.27 ± 3.66 | 16.60 ± 3.36 | 14.47 ± 3.06 | <0.001 | 21.64 ± 2.30 | 19.68 ± 4.22 | 17.04 ± 3.45 | 14.21 ± 3.40 | <0.001 |
| TAPSE/PASP | 0.62 (0.56, 0.87) | 0.41 (0.28, 0.50) | 0.22 (0.17, 0.31) | 0.16 (0.12, 0.20) | <0.001 | 0.71 (0.59, 0.80) | 0.38 (0.31, 0.44) | 0.25 (0.17, 0.34) | 0.15 (0.12, 0.18) | <0.001 |

Table 1 (continued)

| Variable | Training Cohort (n = 323) | | | | | Validation Cohort (n = 129) | | | | |
| --- | --- | --- | --- | --- | --- | --- | --- | --- | --- | --- |
| mPAP≤20 mmHg  (n = 43) | 20＜mPAP≤35 mmHg  (n = 79) | 35＜mPAP≤45 mmHg  (n = 92) | mPAP＞45 mmHg  (n = 160) | *p*-value | mPAP≤20 mmHg  (n = 14) | 20＜mPAP≤35 mmHg  (n = 20) | 35＜mPAP≤45 mmHg  (n = 27) | mPAP＞45 mmHg  (n = 60) | *p*-value |
| MPI | 0.41 (0.39, 0.44) | 0.48 (0.40, 0.54) | 0.60 (0.52, 0.84) | 0.77 (0.62, 0.92) | <0.001 | 0.41 (0.38, 0.46) | 0.53 (0.41, 0.66) | 0.65 (0.57, 0.87) | 0.76 (0.60, 0.94) | <0.001 |
| S', cm/s | 11.90 (11.00, 14.00) | 11.90（10.1, 14.0） | 10.70 (8.78, 12.45) | 9.68 (8.21, 11.20) | <0.001 | 13.00 (12.00, 15.00) | 12.35 (11.35, 14.88) | 11.10 (9.66, 13.45) | 9.21 (7.63, 11.35) | <0.001 |
| E', cm/s | 7.00（6.40, 8.05） | 8.00 (5.98, 9.46) | 7.04 (5.34, 9.84) | 6.53 (5.21, 8.51) | 0.023 | 7.1（6.8, 9.0） | 9.80 (8.25, 12.18) | 8.05 (6.85, 9.04) | 7.22 (5.95, 9.41) | 0.005 |
| A', cm/s | 10.80（9.23, 12.65） | 12.00（9.65, 16.0） | 13.20 (9.79, 16.25) | 12.00 (8.21, 15.18) | 0.056 | 11.00 (10.08, 13.45) | 15.90 (14.88, 17.47) | 12.10 (9.99, 15.65) | 12.65 (8.75, 16.12) | 0.003 |
| **RHC characteristics** |  |  |  |  |  |  |  |  |  |  |
| CVP, mmHg | 3.00 (2.00, 4.00) | 4.00 (1.50, 6.00) | 4.82 (3.00, 7.00) | 8.00 (5.00, 11.00) | <0.001 | 2.50 (2.00, 3.75) | 4.24 (3.75, 7.25) | 4.00 (3.00, 7.50) | 7.00 (4.00, 11.00) | <0.001 |
| sPAP, mmHg | 27.93 ± 4.72 | 46.32 ± 9.61 | 69.20 ± 8.13 | 95.11 ± 13.84 | <0.001 | 29.57 ± 4.96 | 47.30 ± 9.87 | 75.74 ± 8.99 | 93.73 ± 17.17 | <0.001 |
| dPAP, mmHg | 10.00 (8.50, 11.00) | 16.00 (14.00, 18.00) | 26.00 (22.00, 28.00) | 36.00 (31.00, 42.25) | <0.001 | 12.00 (10.00, 12.75) | 19.50 (15.50, 21.00) | 25.00 (21.00, 26.00) | 37.50 (30.75, 43.00) | <0.001 |
| PCWP, mmHg | 7.00 (5.00, 8.00) | 7.00 (5.00, 10.00) | 8.00 (5.75, 10.00) | 10.00 (8.00, 13.00) | <0.001 | 8.00 (7.00, 8.00) | 9.00 (6.83, 11.00) | 8.00 (7.00, 10.50) | 10.00 (7.75, 11.79) | 0.020 |
| CO, L/min | 5.39 (4.41, 6.35) | 4.63 (4.19, 5.76) | 4.35 (3.38, 5.43) | 3.74 (3.07, 4.42) | <0.001 | 5.47 (4.99, 6.57) | 5.07 (4.17, 5.68) | 5.06 (3.74, 6.72) | 3.79 (3.08, 4.66) | <0.001 |
| PVR, dyn·s·cm−5 | 141.00（106.50，193.00） | 281.00 (206.00, 416.50) | 614.00 (494.00, 803.75) | 974.00 (766.48, 1176.50) | <0.001 | 143.50 (118.50, 186.50) | 300.00 (235.75, 421.30) | 514.50 (391.00, 653.00) | 1045.24 (748.25, 1327.13) | <0.001 |
| CI, L/min | 2.97 (2.65, 3.75) | 2.74 (2.41, 3.29) | 2.57 (2.04, 3.00) | 2.24 (1.89, 2.60) | <0.001 | 3.24 (2.82, 3.51) | 2.70 (2.57, 3.04) | 2.54 (2.04, 2.89) | 2.20 (1.81, 2.66) | <0.001 |

6MWD = six-minute walk distance; A' = late diastolic peak velocity of tricuspid annulus; BMI = body mass index; BSA = body surface area; CI = cardiac index; CO = cardiac output; CVP = central venous pressure; dBP = diastolic blood pressure; dPAP = diastolic pulmonary artery pressure; E' = early diastolic peak velocity of tricuspid annulus; EI = eccentricity Index; FAC = fractional area change; HR = heart rate; LPA = left pulmonary artery; LVEF = left ventricular ejection fraction; LVD = left ventricular diameter; MPI = myocardial performance index; MPA = main pulmonary artery; NT_proBNP = N-terminal pro-brain natriuretic peptide; PASP = pulmonary artery systolic pressure; PCWP = pulmonary capillary wedge pressure; PVR = pulmonary vascular resistance; RHC = right heart catheterization; RPA = right pulmonary artery; RVEDA = right ventricular end-diastolic area; RVESA = right ventricular end-systolic area; RVD = right ventricular diameter; S' = systolic peak velocity of tricuspid annulus; sBP = systolic blood pressure; sPAP = systolic pulmonary artery pressure; SpO2 = peripheral capillary oxygen saturation; TAPSE = tricuspid annular plane systolic excursion; WHO FC = world health organization functional class.
